# Supplementary material for: Four Tick-Borne Microorganisms and Their Prevalence in Hyalomma Ticks Collected from Livestock in United Arab Emirates
Source: MDPI journal article supplement (doi:10.3390/pathogens10081005), 2021-08-09
Supplement: s1 [file s1]

Table S1. Molecular identification of *Francisella* sp. endosymbiont isolated from *H. dromedarii* collected from camels in Abu Dhabi, UAE based on DNA similarity between 16S rRNA gene and GenBank species using NCBI BLAST.

| Best Match Species                                              | Accession Number | Sequence Identity % | Sequence Coverage % | E-value <sup>a</sup> | Host                            | Country   |
|-----------------------------------------------------------------|------------------|---------------------|---------------------|----------------------|---------------------------------|-----------|
| Uncultured <i>Francisella</i> sp. clone FraApaulo               | MN998649.1       | 98.59               | 100                 | 0.0                  | <i>Amblyomma paulopunctatum</i> | France    |
| <i>Francisella</i> endosymbiont                                 | JQ764629.1       | 98.59               | 100                 | 0.0                  | <i>Dermacentor auratus</i>      | Thailand  |
| <i>Ornithodoros moubata</i> symbiont                            | AB001522.1       | 98.59               | 100                 | 0.0                  | <i>Ornithodoros moubata</i>     | Japan     |
| Uncultured <i>Francisella</i> sp. clone FraAscul                | MN998650.1       | 98.47               | 100                 | 0.0                  | <i>Amblyomma sculptum</i>       | France    |
| <i>Francisella</i> endosymbiont                                 | JQ764628.1       | 98.47               | 100                 | 0.0                  | <i>Dermacentor auratus</i>      | Thailand  |
| Uncultured <i>Francisella</i> sp. clone FraAhume3               | MN998638.1       | 98.35               | 100                 | 0.0                  | <i>Amblyomma humerale</i>       | France    |
| Uncultured <i>Francisella</i> sp. clone FraAhume2               | MN998637.1       | 98.35               | 100                 | 0.0                  | <i>Amblyomma humerale</i>       | France    |
| Uncultured <i>Francisella</i> sp. clone FraAhume1               | MN998636.1       | 98.35               | 100                 | 0.0                  | <i>Amblyomma humerale</i>       | France    |
| Uncultured <i>Francisella</i> sp. clone 627HBF ZOTU 13a         | MN088353.1       | 98.35               | 100                 | 0.0                  | <i>Haemaphysalis bancrofti</i>  | Australia |
| Uncultured <i>Francisella</i> sp. clone 297HBF ZOTU 13a         | MN088349.1       | 98.35               | 100                 | 0.0                  | <i>Haemaphysalis bancrofti</i>  | Australia |
| <i>Francisella</i> endosymbiont of <i>Ornithodoros porcinus</i> | AF166257.1       | 98.35               | 100                 | 0.0                  | <i>Ornithodoros porcinus</i>    | USA       |
| Uncultured bacterium clone he_23                                | KX465127.1       | 98.35               | 100                 | 0.0                  | Tick                            | China     |
| Uncultured bacterium clone he_17                                | KX465125.1       | 98.35               | 100                 | 0.0                  | Tick                            | China     |
| Uncultured bacterium clone he_6                                 | KX465118.1       | 98.35               | 100                 | 0.0                  | Tick                            | China     |
| Uncultured bacterium clone he_5                                 | KX465117.1       | 98.35               | 100                 | 0.0                  | Tick                            | China     |
| Uncultured bacterium clone he_1                                 | KX465115.1       | 98.35               | 100                 | 0.0                  | Tick                            | China     |
| <i>Francisella</i> endosymbiont isolate XJ-S3                   | KX852466.1       | 98.35               | 100                 | 0.0                  | <i>Hyalomma asiaticum</i>       | China     |
| <i>Francisella</i> endosymbiont isolate XJ-S1                   | KX852464.1       | 98.35               | 100                 | 0.0                  | <i>Hyalomma asiaticum</i>       | China     |
| Uncultured <i>Francisella</i> sp.                               | MN998635.1       | 98.24               | 100                 | 0.0                  | <i>Amblyomma goeldii</i>        | France    |
| Uncultured <i>Francisella</i> sp.                               | MN998634.1       | 98.24               | 100                 | 0.0                  | <i>Amblyomma goeldii</i>        | France    |
| Uncultured <i>Francisella</i> sp.                               | MN998633.1       | 98.24               | 100                 | 0.0                  | <i>Amblyomma goeldii</i>        | France    |
| Uncultured <i>Francisella</i> sp. clone FraAvari                | MN998648.1       | 98.24               | 100                 | 0.0                  | <i>Amblyomma varium</i>         | France    |
| Uncultured <i>Francisella</i> sp. clone 297HBF ZOTU 13a         | MN088357.1       | 98.24               | 100                 | 0.0                  | <i>Haemaphysalis bancrofti</i>  | Australia |
| <i>Francisella</i> endosymbiont of <i>Hyalomma marginatum</i>   | AF166257.1       | 98.24               | 100                 | 0.0                  | <i>Rhipicephalus bursa</i>      | Italy     |
| <i>Francisella</i> -like endosymbiont                           | MH645205.1       | 98.24               | 100                 | 0.0                  | <i>Hyalomma aegyptium</i>       | Turkey    |
| <i>Francisella</i> -like endosymbiont                           | MH645204.1       | 98.24               | 100                 | 0.0                  | <i>Hyalomma aegyptium</i>       | Turkey    |
| <i>Francisella</i> -like endosymbiont                           | MH645203.1       | 98.24               | 100                 | 0.0                  | <i>Hyalomma aegyptium</i>       | Turkey    |
| <i>Francisella</i> -like endosymbiont                           | MH645202.1       | 98.24               | 100                 | 0.0                  | <i>Hyalomma aegyptium</i>       | Turkey    |
| <i>Francisella</i> -like endosymbiont                           | MH645201.1       | 98.24               | 100                 | 0.0                  | <i>Hyalomma aegyptium</i>       | Turkey    |

<sup>a</sup> The typical threshold for a good E-value from a BLAST search is 10<sup>-5</sup> or lower.

Table S2. Molecular identification of Uncultured *Rickettsia* sp. isolated from *H. dromedarii* collected from camels in Abu Dhabi, UAE based on DNA similarity between *ompA* gene and GenBank species using NCBI BLAST.

| Best Match Species                                                        | Accession Number | Sequence Identity % | Sequence Coverage % | E-value* | Host                       | Country   |
|---------------------------------------------------------------------------|------------------|---------------------|---------------------|----------|----------------------------|-----------|
| Uncultured <i>Rickettsia</i> sp. clone C269_18                            | MK522488.1       | 99.80               | 100                 | 0.0      | <i>Amblyomma parvum</i>    | Brazil    |
| <i>Candidatus Rickettsia andeanae</i> clone Caxias                        | KY628370.1       | 99.80               | 100                 | 0.0      | <i>Amblyomma parvum</i>    | Brazil    |
| <i>Candidatus Rickettsia andeanae</i> haplotype BQ-RS                     | KX434737.1       | 99.80               | 100                 | 0.0      | <i>Amblyomma tigrinum</i>  | Brazil    |
| <i>Candidatus Rickettsia andeanae</i> clone 4                             | KX158267.1       | 99.80               | 100                 | 0.0      | <i>Amblyomma maculatum</i> | USA       |
| <i>Candidatus Rickettsia andeanae</i> clone 3                             | KX158266.1       | 99.80               | 100                 | 0.0      | <i>Amblyomma maculatum</i> | USA       |
| <i>Candidatus Rickettsia andeanae</i> isolate Agripino Enciso             | KF179352.1       | 99.80               | 100                 | 0.0      | <i>Amblyomma parvum</i>    | Paraguay  |
| <i>Candidatus Rickettsia andeanae</i> isolate Ap                          | KF030932.1       | 99.80               | 100                 | 0.0      | <i>Amblyomma parvum</i>    | Brazil    |
| Uncultured <i>Rickettsia</i> sp. clone ALAIN-001-2011                     | KF156874.1       | 99.80               | 100                 | 0.0      | <i>Hyalomma dromedarii</i> | UAE       |
| <i>Rickettsia</i> endosymbiont of <i>Amblyomma maculatum</i> strain SH_B4 | JX134638.1       | 99.80               | 100                 | 0.0      | <i>Amblyomma maculatum</i> | USA       |
| <i>Candidatus Rickettsia andeanae</i> isolate At2                         | MT968426.1       | 99.80               | 100                 | 0.0      | <i>Amblyomma tigrinum</i>  | Brazil    |
| <i>Candidatus Rickettsia andeanae</i> isolate At2                         | JQ690599.1       | 99.80               | 100                 | 0.0      | <i>Haemaphysalis</i> sp.   | USA       |
| <i>Candidatus Rickettsia amblyommii</i> isolate 61A                       | JQ690625.1       | 94.78               | 98                  | 0.0      | <i>Haemaphysalis</i> sp.   | USA       |
| <i>Candidatus Rickettsia andeanae</i> isolate G614                        | KX576678.1       | 99.76               | 83                  | 0.0      | <i>Amblyomma tigrinum</i>  | Argentina |
| <i>Candidatus Rickettsia amblyommii</i> isolate GP4A                      | KM652487.1       | 94.27               | 99                  | 0.0      | Hard ticks                 | Panama    |
| <i>Candidatus Rickettsia amblyommii</i> isolate 23B                       | JQ690590.1       | 94.76               | 97                  | 0.0      | <i>Haemaphysalis</i> sp.   | USA       |
| Uncultured <i>Rickettsia</i> sp. clone SH_MG7                             | JQ914762.1       | 94.08               | 99                  | 0.0      | <i>Amblyomma maculatum</i> | USA       |

Table S3. Molecular identification of *T. annulata* isolated from *H. anatolicum* collected from cows in Sharjah, UAE based on DNA similarity between *ssrRNA* gene and GenBank species using NCBI BLAST.

| Best Match Species                             | Accession Number | Sequence Identity % | Sequence Coverage % | E-value <sup>a</sup> | Host              | Country  |
|------------------------------------------------|------------------|---------------------|---------------------|----------------------|-------------------|----------|
| <i>Theileria annulata</i>                      | MT341858.1       | 99.62               | 99                  | 0.0                  | <i>Bos taurus</i> | Italy    |
| <i>Theileria annulata</i>                      | MT341857.1       | 99.62               | 99                  | 0.0                  | <i>Bos taurus</i> | Italy    |
| <i>Theileria annulata</i> isolate T178         | MT318160.1       | 99.62               | 99                  | 0.0                  | Ruminants         | Pakistan |
| <i>Theileria annulata</i> isolate T79          | MT318159.1       | 99.62               | 99                  | 0.0                  | Ruminants         | Pakistan |
| <i>Theileria annulata</i> isolate T33          | MT318158.1       | 99.62               | 99                  | 0.0                  | Ruminants         | Pakistan |
| <i>Theileria annulata</i> isolate Ticks, No 46 | MN227669.1       | 99.62               | 99                  | 0.0                  | Ticks             | Egypt    |
| <i>Theileria annulata</i> isolate Ticks, No 45 | MN227668.1       | 99.62               | 99                  | 0.0                  | Ticks             | Egypt    |
| <i>Theileria annulata</i> isolate Ticks, No 44 | MN227667.1       | 99.62               | 99                  | 0.0                  | Ticks             | Egypt    |
| <i>Theileria annulata</i> isolate Ticks, No 24 | MN227666.1       | 99.62               | 99                  | 0.0                  | Ticks             | Egypt    |
| <i>Theileria annulata</i> isolate 355          | MN223736.1       | 99.62               | 99                  | 0.0                  | Unpublished data  | Egypt    |
| <i>Theileria annulata</i> clone 5-31           | AY508465.1       | 99.62               | 99                  | 0.0                  | Cattle            | Turkey   |
| <i>Theileria annulata</i> isolate Turkey 4     | AY508464.1       | 99.62               | 99                  | 0.0                  | Cattle            | Turkey   |
| <i>Theileria annulata</i> isolate Turkey 3     | AY508463.1       | 99.62               | 99                  | 0.0                  | Cattle            | Turkey   |
| <i>Theileria annulata</i>                      | EU083801.1       | 99.43               | 99                  | 0.0                  | <i>Bos taurus</i> | China    |
| <i>Theileria annulata</i>                      | M64243.1         | 99.43               | 99                  | 0.0                  | Bovine            | USA      |

Table S4. Molecular identification of *T. ovis* isolated from *H. anatolicum* collected from goats in Sharjah, UAE based on DNA similarity between *ssrRNA* gene and GenBank species using NCBI BLAST.

| Best Match Species                   | Accession Number | Sequence Identity % | Sequence Coverage % | E-value <sup>a</sup> | Host                 | Country |
|--------------------------------------|------------------|---------------------|---------------------|----------------------|----------------------|---------|
| <i>Theileria ovis</i> isolate HBOY1  | MN394810.1       | 99.81               | 99                  | 0.0                  | <i>Bos grunniens</i> | China   |
| <i>Theileria ovis</i> isolate HXTS1  | MN394809.1       | 99.81               | 99                  | 0.0                  | Tibetan sheep        | China   |
| <i>Theileria ovis</i> isolate HBTS1  | MN394808.1       | 99.81               | 99                  | 0.0                  | Tibetan sheep        | China   |
| <i>Theileria ovis</i> isolate SH. T1 | MN712508.1       | 99.81               | 99                  | 0.0                  | Sheep                | Iraq    |
| <i>Theileria ovis</i> isolate SH. T5 | MN704656.1       | 99.81               | 99                  | 0.0                  | Sheep                | Iraq    |
| <i>Theileria ovis</i> isolate THOD2  | MN625903.1       | 99.81               | 99                  | 0.0                  | Donkey               | Egypt   |
| <i>Theileria ovis</i> isolate THOB2  | MN625887.1       | 99.81               | 99                  | 0.0                  | Buffalo              | Egypt   |
| <i>Theileria ovis</i> isolate THOSH5 | MN625886.1       | 99.81               | 99                  | 0.0                  | Sheep                | Egypt   |
| <i>Theileria ovis</i> isolate SH.S2  | MN544931.1       | 99.81               | 99                  | 0.0                  | Sheep                | Iraq    |
| <i>Theileria ovis</i> isolate 3kz7   | MN493111.1       | 99.81               | 99                  | 0.0                  | Sheep                | Turkey  |
| <i>Theileria</i> sp. Iwate 141 gene  | AB602888.1       | 99.81               | 99                  | 0.0                  | <i>Cervus nippon</i> | Japan   |
| <i>Theileria</i> sp. Iwate 276 gene  | AB602887.1       | 99.81               | 99                  | 0.0                  | <i>Cervus nippon</i> | Japan   |
| <i>Theileria</i> sp. Iwate 228 gene  | AB602886.1       | 99.81               | 99                  | 0.0                  | <i>Cervus nippon</i> | Japan   |
| <i>Theileria</i> sp. Iwate 194 gene  | AB602885.1       | 99.81               | 99                  | 0.0                  | <i>Cervus nippon</i> | Japan   |
| <i>Theileria</i> sp. Iwate 169 gene  | AB602883.1       | 99.81               | 99                  | 0.0                  | <i>Cervus nippon</i> | Japan   |

Table S5. Prevalence of microbes in *Hyalomma* ticks in UAE.

| Sr. No.   | Farm Locations           | Samples (Camels) | Samples (Cows) | Samples (Sheep) | Samples (Goats) | Total Samples | <i>Francisella</i> sp. (positive samples) | <i>Rickettsia</i> sp. (positive samples) | <i>Theileria annulata</i> (positive samples) | <i>Theileria ovis</i> (positive samples) |
|-----------|--------------------------|------------------|----------------|-----------------|-----------------|---------------|-------------------------------------------|------------------------------------------|----------------------------------------------|------------------------------------------|
| Abu Dhabi |                          |                  |                |                 |                 |               |                                           |                                          |                                              |                                          |
| 1.        | Al-Foah, UAEU            | 2                | -              | -               | -               | 2             | 1                                         | -                                        | -                                            | -                                        |
| 2.        | Beda Bent Saud           | 6                | -              | -               | -               | 6             | 1                                         | -                                        | -                                            | -                                        |
| 3.        | Livestock Market, Al Ain | 11               | -              | 4 (36)          | -               | 15            | 1                                         | -                                        | -                                            | -                                        |
| 4.        | Nahel Town               | 24               | -              | -               | -               | 24            | 2                                         | 2                                        | -                                            | -                                        |
| 5.        | Omghafa                  | 84               | -              | -               | -               | 84            | 3                                         | 1                                        | -                                            | -                                        |
| 6.        | Truck Road               | 20               | -              | -               | -               | 20            | 4                                         | -                                        | -                                            | -                                        |
| 7.        | Al-Wagan                 | 30               | -              | -               | -               | 30            | 5                                         | 1                                        | -                                            | -                                        |
| 8.        | Dubai Road               | 70               | 0 (15)         | -               | -               | 70            | 4                                         | 1                                        | -                                            | -                                        |
| 9.        | Bukriya                  | 15               | -              | -               | -               | 15            | 5                                         | 2                                        | -                                            | -                                        |
| 10.       | Al-Saad                  | 53               | -              | -               | -               | 53            | 4                                         | -                                        | -                                            | -                                        |
| 11.       | Al-Hayer                 | 5                | -              | -               | -               | 5             | -                                         | -                                        | -                                            | -                                        |
| 12.       | Swehan                   | 24               | -              | -               | -               | 24            | -                                         | -                                        | -                                            | -                                        |
| 13.       | Nabagh                   | 15               | -              | -               | -               | 15            | -                                         | -                                        | -                                            | -                                        |
| 14.       | Al-Dahra                 | 50               | -              | -               | 0 (30)          | 50            | -                                         | -                                        | -                                            | -                                        |
| 15.       | Al-Yahar                 | 6                | -              | -               | -               | 6             | -                                         | -                                        | -                                            | -                                        |
| 16.       | Malaket                  | 12               | -              | -               | -               | 12            | -                                         | -                                        | -                                            | -                                        |
| 17.       | Remah                    | 5                | -              | -               | -               | 5             | -                                         | -                                        | -                                            | -                                        |
| 18.       | Beda Fares               | 17               | -              | -               | -               | 17            | -                                         | -                                        | -                                            | -                                        |
| 19.       | Seh Saba                 | 3                | -              | -               | -               | 3             | -                                         | -                                        | -                                            | -                                        |
| 20.       | Bilayat                  | 2                | -              | -               | -               | 2             | -                                         | -                                        | -                                            | -                                        |
| 21.       | Al-Arad                  | 44               | -              | -               | -               | 44            | -                                         | -                                        | -                                            | -                                        |
| Sub-total |                          | 498 (498)        | 0              | 4 (36)          | 0               | 502 (534)     | 30                                        | 7                                        |                                              |                                          |
| Dubai     |                          |                  |                |                 |                 |               |                                           |                                          |                                              |                                          |
| 22.       | Dubai Camel Hospital     | 17 (17)          | -              | -               | -               | 17            | -                                         | -                                        | -                                            | -                                        |
| 23.       | Al-Qusais Market, Dubai  | -                | 20 (20)        | 9 (9)           | 9 (9)           | 38            | -                                         | -                                        | -                                            | -                                        |
| Sub-total |                          | 17 (17)          | 20 (20)        | 9 (9)           | 9 (9)           | 55 (55)       |                                           |                                          |                                              |                                          |
| Sharjah   |                          |                  |                |                 |                 |               |                                           |                                          |                                              |                                          |
| 24.       | Kalba, Sharjah           | 1 (3)            | 2 (6)          | 1 (25)          | 1 (25)          | 5             | -                                         | -                                        | 1                                            | 1                                        |
| Sub-total |                          | 1 (3)            | 2 (6)          | 1 (25)          | 1 (25)          | 5 (59)        | -                                         | -                                        | 1 (detected in ticks from cows)              | 1 (detected in ticks from goats)         |
| Total     |                          | 516 (518)        | 22 (26)        | 14 (70)         | 10 (34)         | 562 (648)     | 30                                        | 7                                        | 1                                            | 1                                        |

Numbers in parenthesis represent the number of animals.
